# Supplementary material
Source: MDPI journal article supplement (https://www.mdpi.com/2311-5637/9/1/67)
Supplement: s1 [file s1 › fermentation-2129976-supplementary.pdf]

## Supplementary

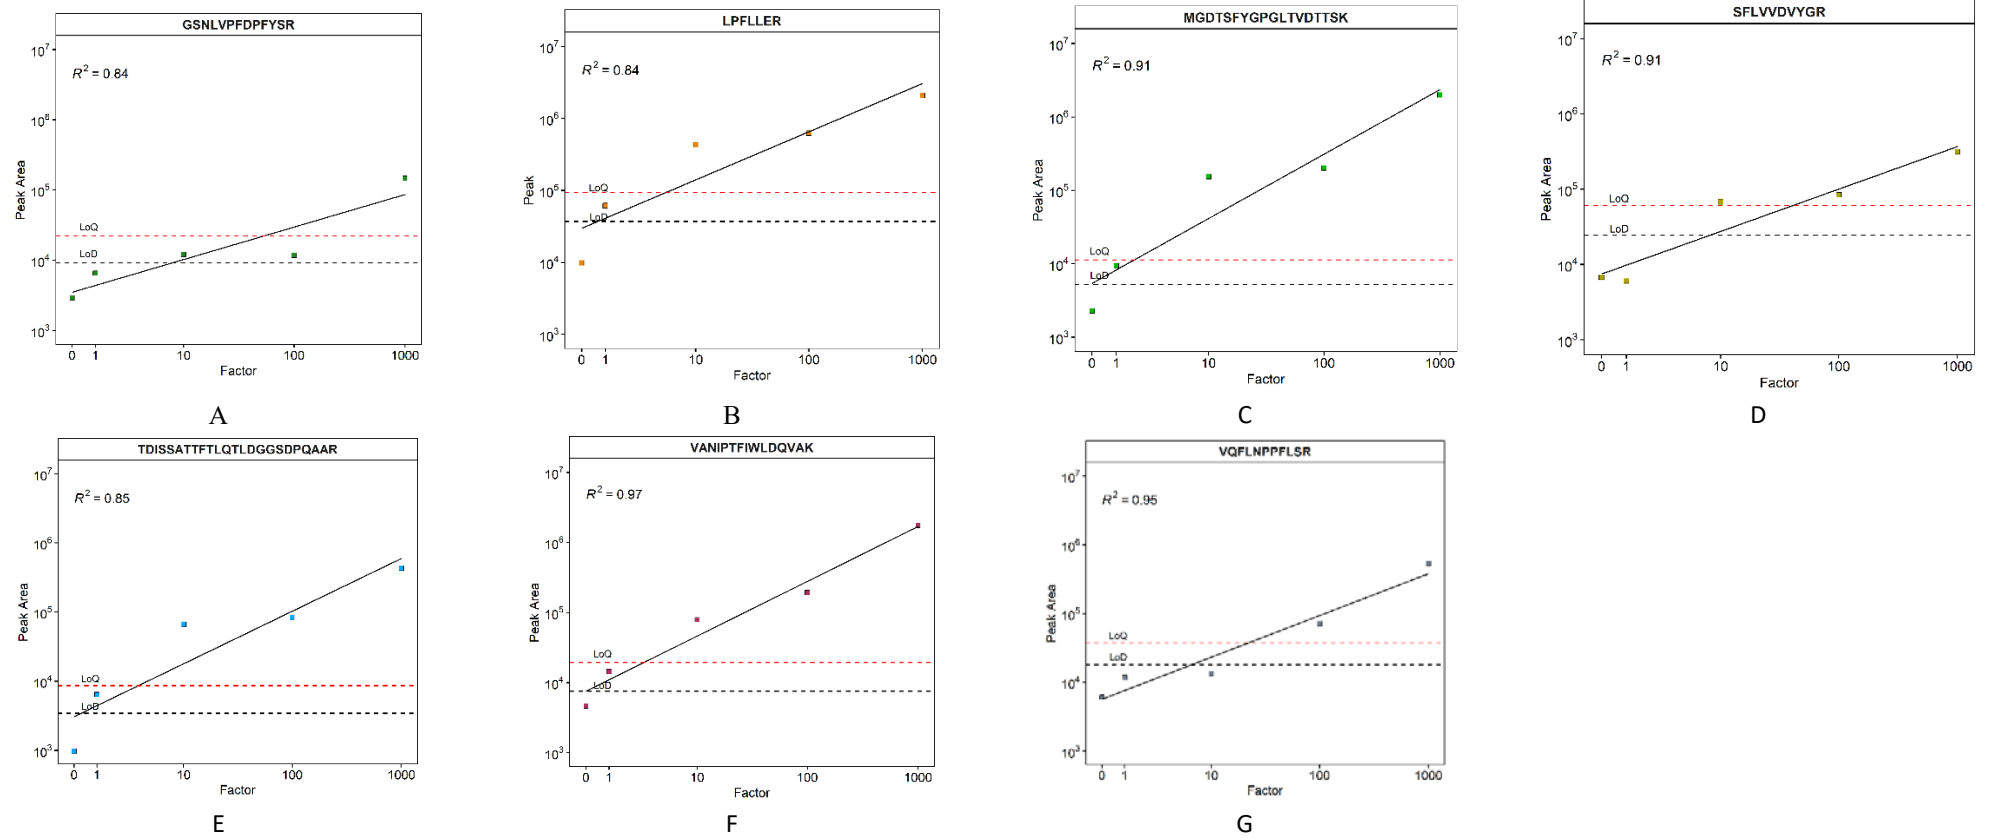

**Figure S1.** Correlation of MRM measurements over different dilutions of the enzyme preparation logarithmically plotted. Given fungal enzyme preparation was added in different dilutions to biogas reactor content and incubated for 24 hours. Peak areas for all measured factors of seven peptides (A-G) are shown with their limits of detection (LoD) and limit of quantification (LoQ). Correlation coefficients are shown in each graph, respectively.

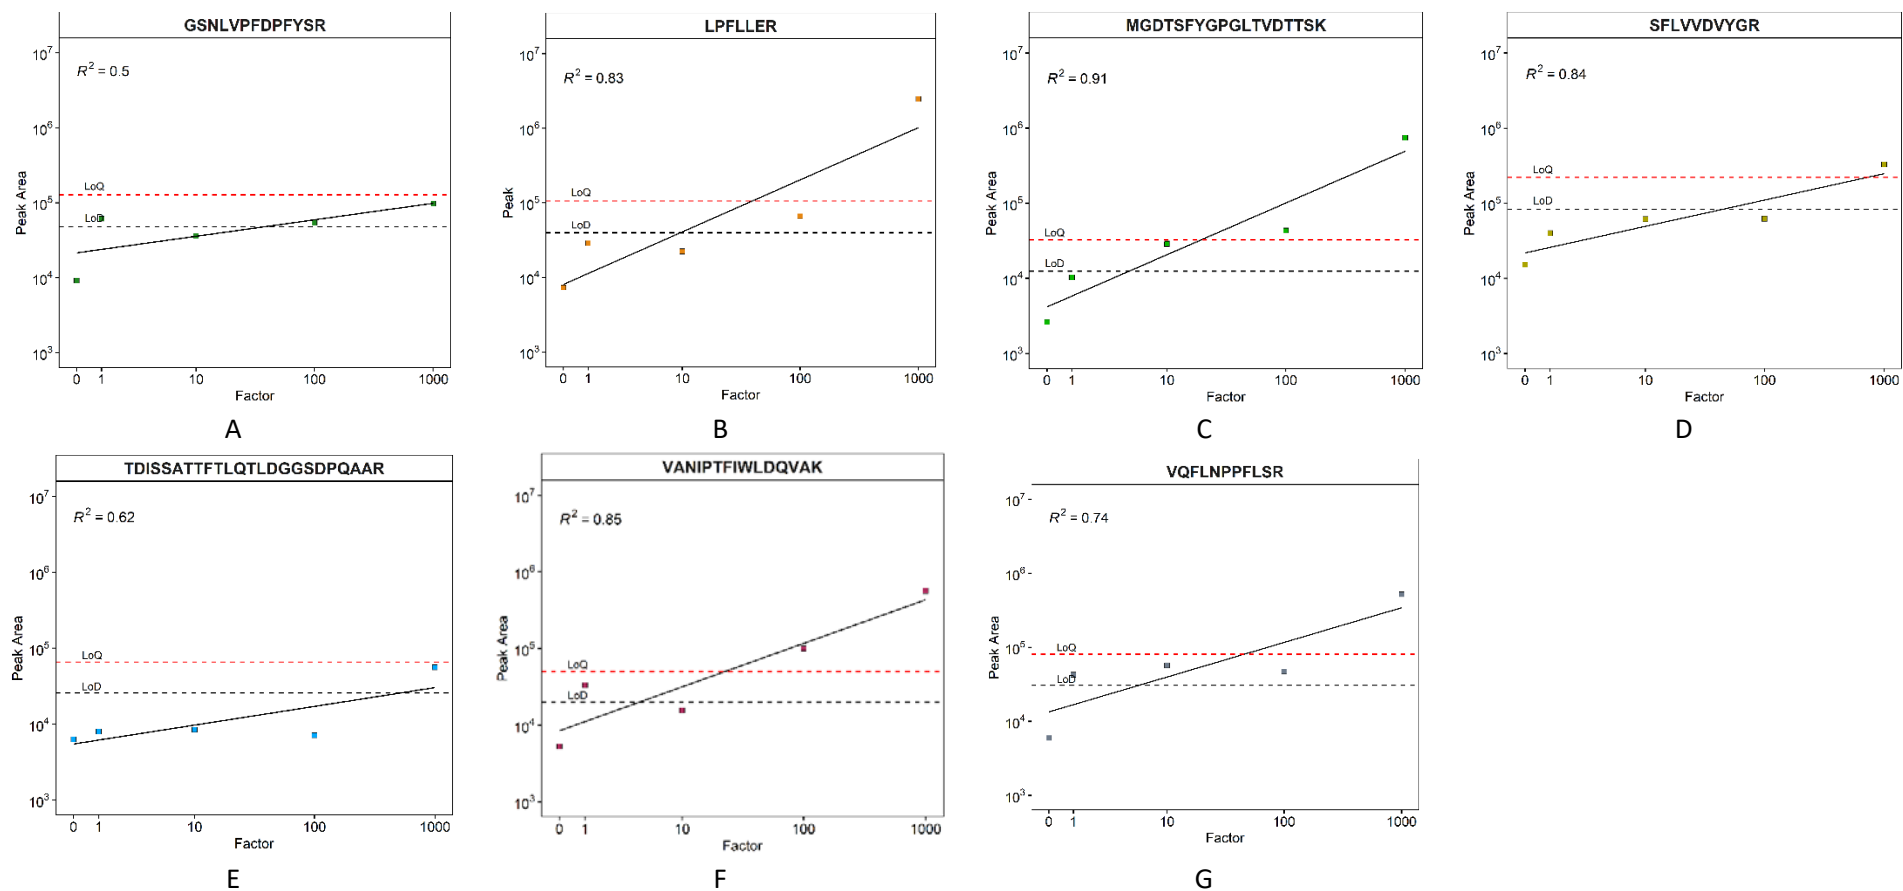

**Figure S2.** Correlation of SWATH-MS measurements over different dilutions of the enzyme preparation logarithmically plotted. Given fungal enzyme preparation was added in different dilutions to biogas reactor content and incubated for 24 hours. Peak areas for all measured factors of seven peptides (A-G) are shown with their limits of detection (LoD) and limit of quantification (LoQ). Correlation coefficients are shown in each graph, respectively.
